# Supplementary material for: LC-MS-Based Metabolomics Study of Marine Bacterial Secondary Metabolite and Antibiotic Production in Salinispora arenicola
Source: MDPI journal article supplement (doi:10.3390/md13010249), 2015-01-07
Supplement: s2 [file s2]

## Supplementary Information

**Table S1.** Summary of information and metrics for the multivariate models used for feature selection.

| Model Comparison                | Number of Variables | Model Type | R <sup>2</sup> X | Q <sup>2</sup> | VIP > 1 |
|---------------------------------|---------------------|------------|------------------|----------------|---------|
| All samples (7, 14 and 29 days) | 1390                | PCA        | 0.56             | 0.34           |         |
| All samples (7, 14 and 29 days) | 1390                | OPLS-DA    | 0.97             | 0.87           | 389     |
| 7 days (1% vs. 3% NaCl)         | 502                 | PCA        | 0.44             | 0.28           |         |
| 7 days (1% vs. 3% NaCl)         | 504                 | OPLS-DA    | 0.98             | 0.76           | 163     |
| 7 days M413 (1% vs. 3%)         | 229                 | PCA        | 0.47             | 0.26           |         |
| 7 days M413 (1% vs. 3%)         | 231                 | OPLS-DA    | 0.89             | 0.99           | 100     |
| 7 days M415 (1% vs. 3%)         | 323                 | PCA        | 0.72             | 0.59           |         |
| 7 days M415 (1% vs. 3%)         | 325                 | OPLS-DA    | 0.72             | 0.99           | 173     |
| 7 days M417 (1% vs. 3%)         | 240                 | PCA        | 0.44             | 0.21           |         |
| 7 days M417 (1% vs. 3%)         | 242                 | OPLS-DA    | 0.86             | 0.88           | 107     |
| 14 days (1% Vs 3% NaCl)         | 479                 | PCA        | 0.70             | 0.46           |         |
| 14 days (1% Vs 3% NaCl)         | 481                 | OPLS-DA    | 0.64             | 0.58           | 173     |
| 14 days M415 (1% vs. 3%)        | 305                 | PCA        | 0.85             | 0.79           |         |
| 14 days M415 (1% vs. 3%)        | 307                 | OPLS-DA    | 0.85             | 0.99           | 199     |
| 14 days M417 (1% vs. 3%)        | 254                 | PCA        | 0.52             | 0.33           |         |
| 14 days M417 (1% vs. 3%)        | 256                 | OPLS-DA    | 0.82             | 0.96           | 123     |
| 29 days (1% vs. 3% NaCl)        | 849                 | PCA        | 0.54             | 0.34           |         |
| 29 days (1% vs. 3% NaCl)        | 851                 | OPLS-DA    | 0.51             | 0.99           | 234     |
| 29 days M413 (1% vs. 3%)        | 469                 | PCA        | 0.44             | 0.30           |         |
| 29 days M413 (1% vs. 3%)        | 471                 | OPLS-DA    | 0.81             | 0.92           | 207     |
| 29 days M415 (1% vs. 3%)        | 625                 | PCA        | 0.78             | 0.68           |         |
| 29 days M415 (1% vs. 3%)        | 627                 | OPLS-DA    | 0.78             | 0.99           | 327     |
| 29 days M417 (1% vs. 3%)        | 361                 | PCA        | 0.46             | 0.19           |         |
| 29 days M417 (1% vs. 3%)        | 363                 | OPLS-DA    | 0.80             | 0.98           | 150     |

R<sup>2</sup>X—“goodness of fit” parameter, varies between 0 and 1, and provides a quantitative measure of the explained variation, where 1 = all variance explained; Q<sup>2</sup>—“goodness of prediction” parameter, varies between 0 and 1, and provides a cross-validated measure of the predictive power of the model, where 1 = complete prediction; VIP—“variable importance in the projection” parameter—variables with VIP>1 are considered the most relevant for explaining the differences denoted by Y, which for OPLS-DA is the grouping variable outlined by the model comparison e.g., 1% NaCl Vs 3% NaCl [44].

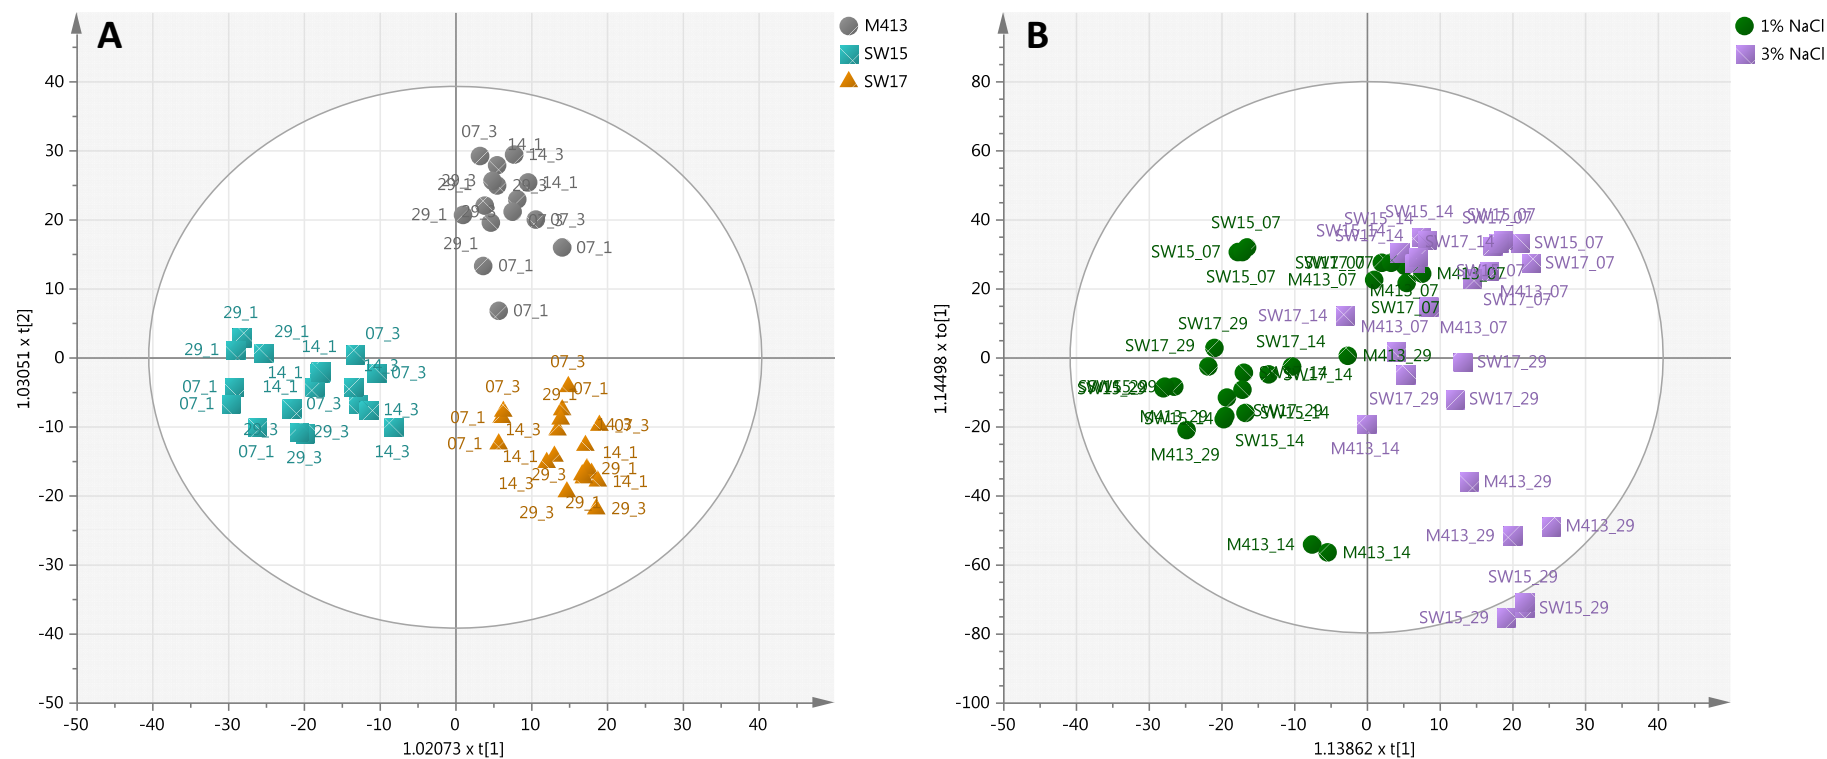

**Figure S1.** OPLS-DA models of the complete data set ( $N = 51$ ), indicating the supervised “separation” based upon (A) *S. arenicola* strain and (B) % NaCl.

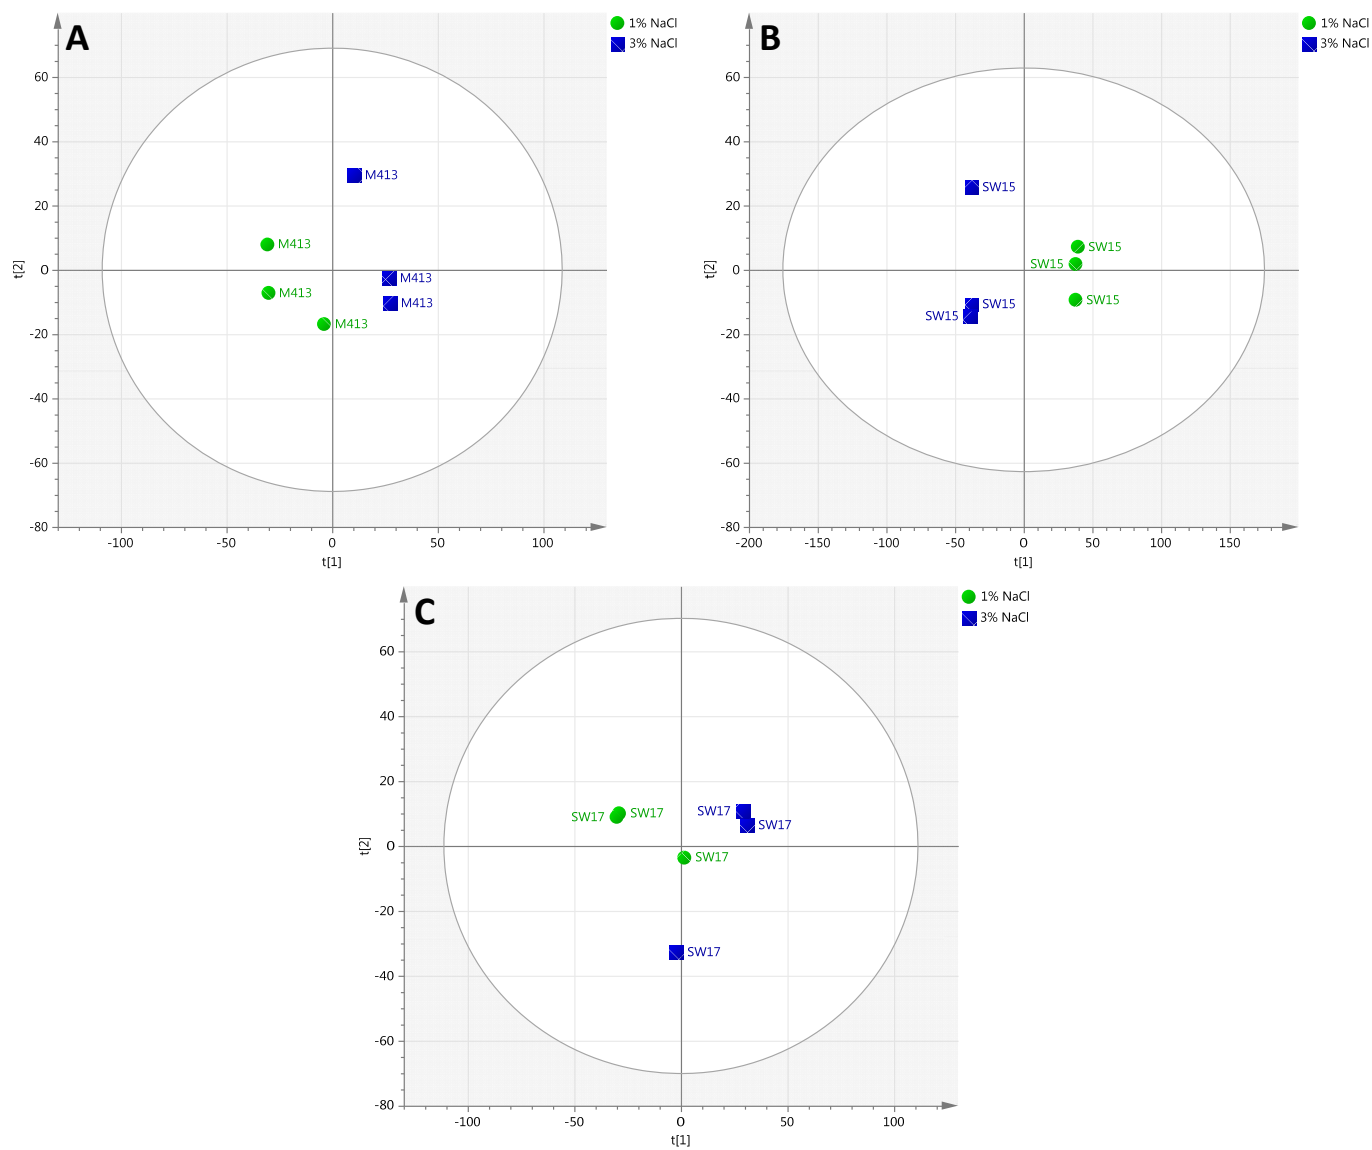

**Figure S2.** PCA models of day 7 samples ( $N = 18$ ) indicating strain-based differences for (A) M413; (B) SW15 and (C) SW17.

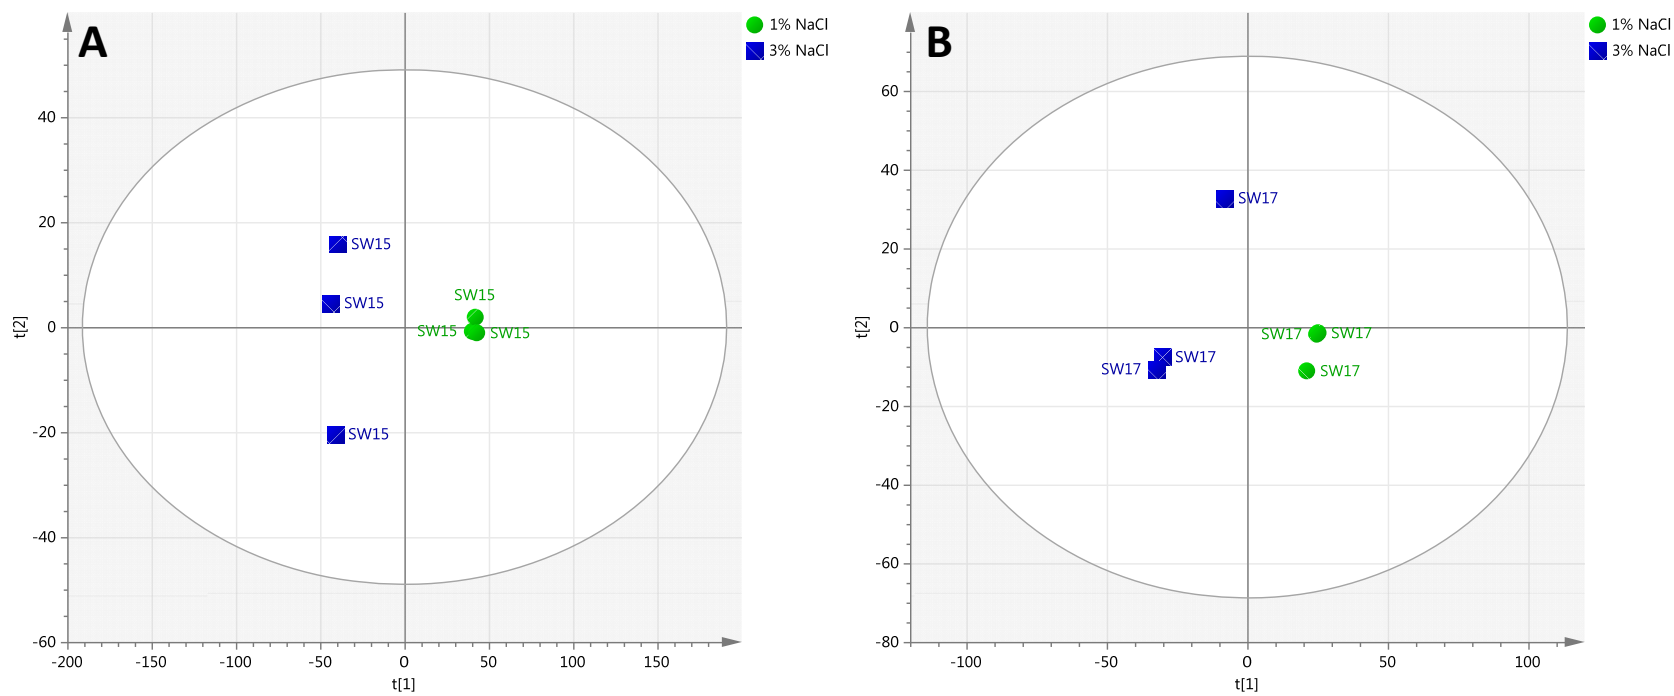

**Figure S3.** PCA models of day 14 samples ( $N = 15$ ) indicating strain-based differences for (A) SW15 and (B) SW17.

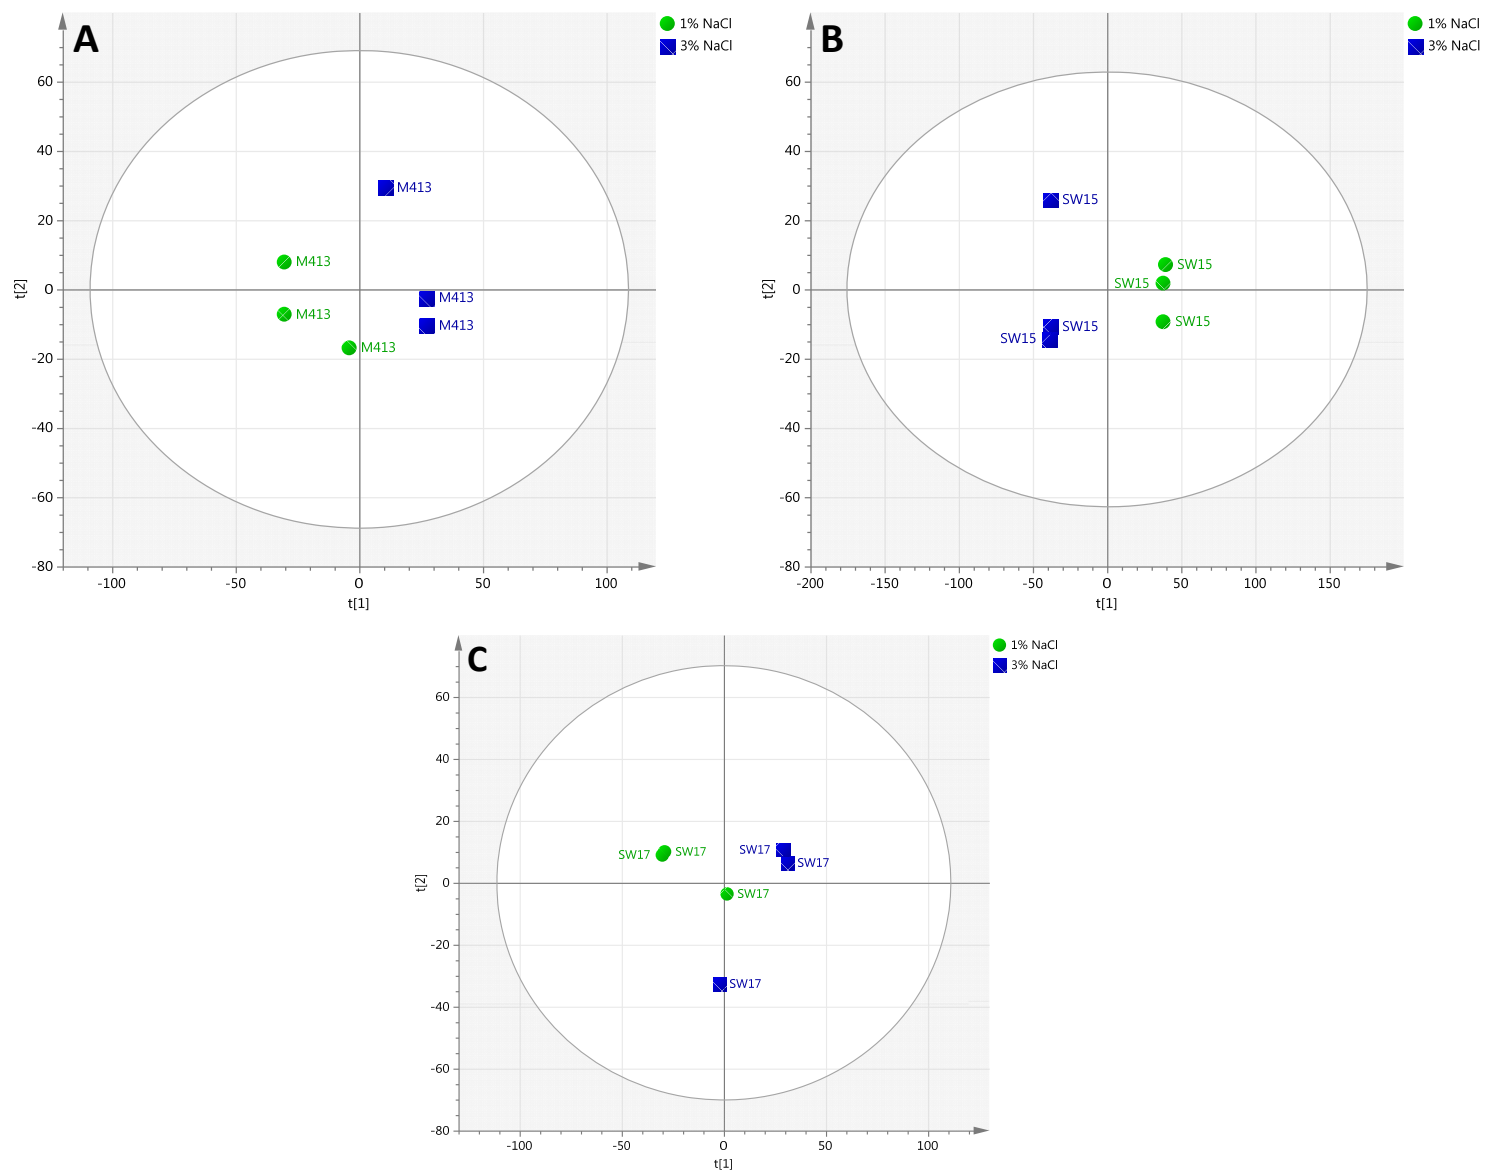

**Figure S4.** PCA models of day 29 samples ( $N = 18$ ) indicating strain-based differences for (A) M413; (B) SW15 and (C) SW17.

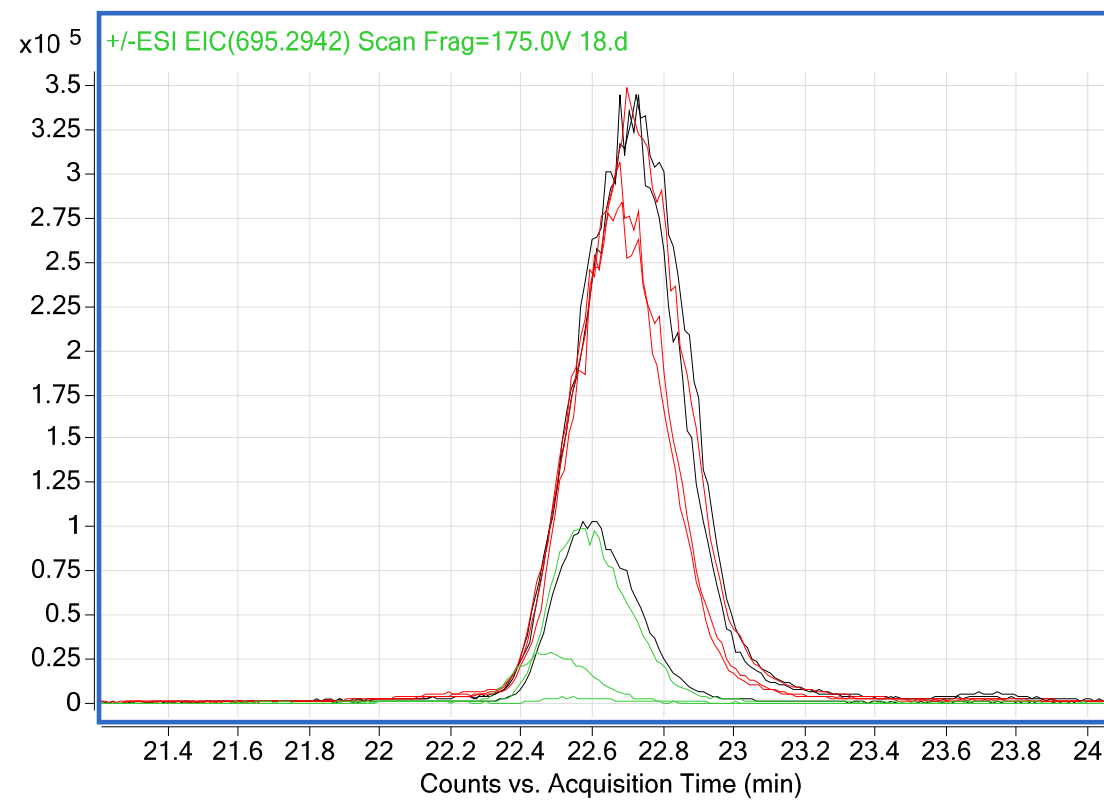

**Figure S5.** Extracted ion chromatograms showing strain-related differences for Rifamycin S day 29; 3% NaCl; M413; SW15; SW17.

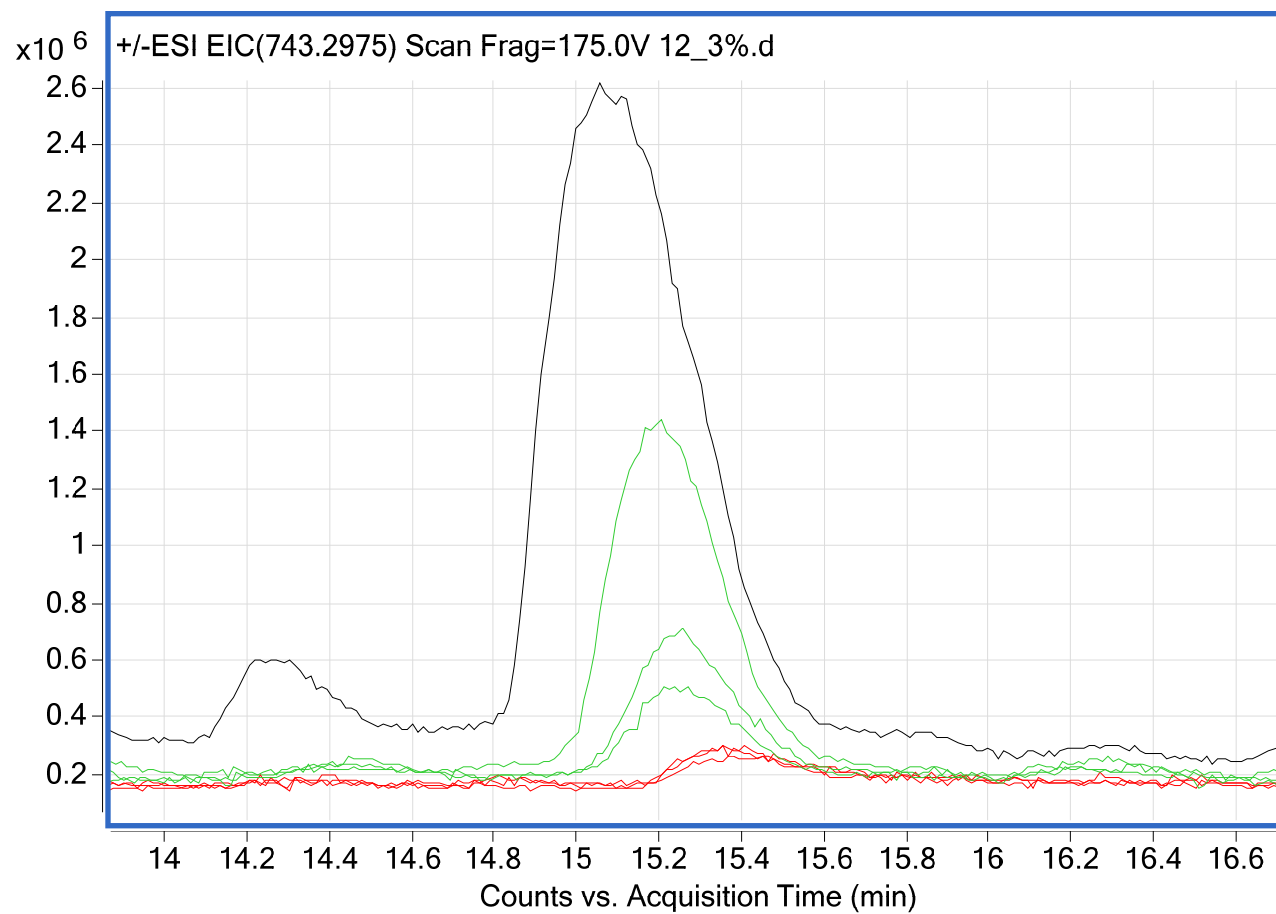

**Figure S6.** Extracted ion chromatograms showing strain-related differences for Awamycin day 14; 3% NaCl; M413; SW15; SW17.

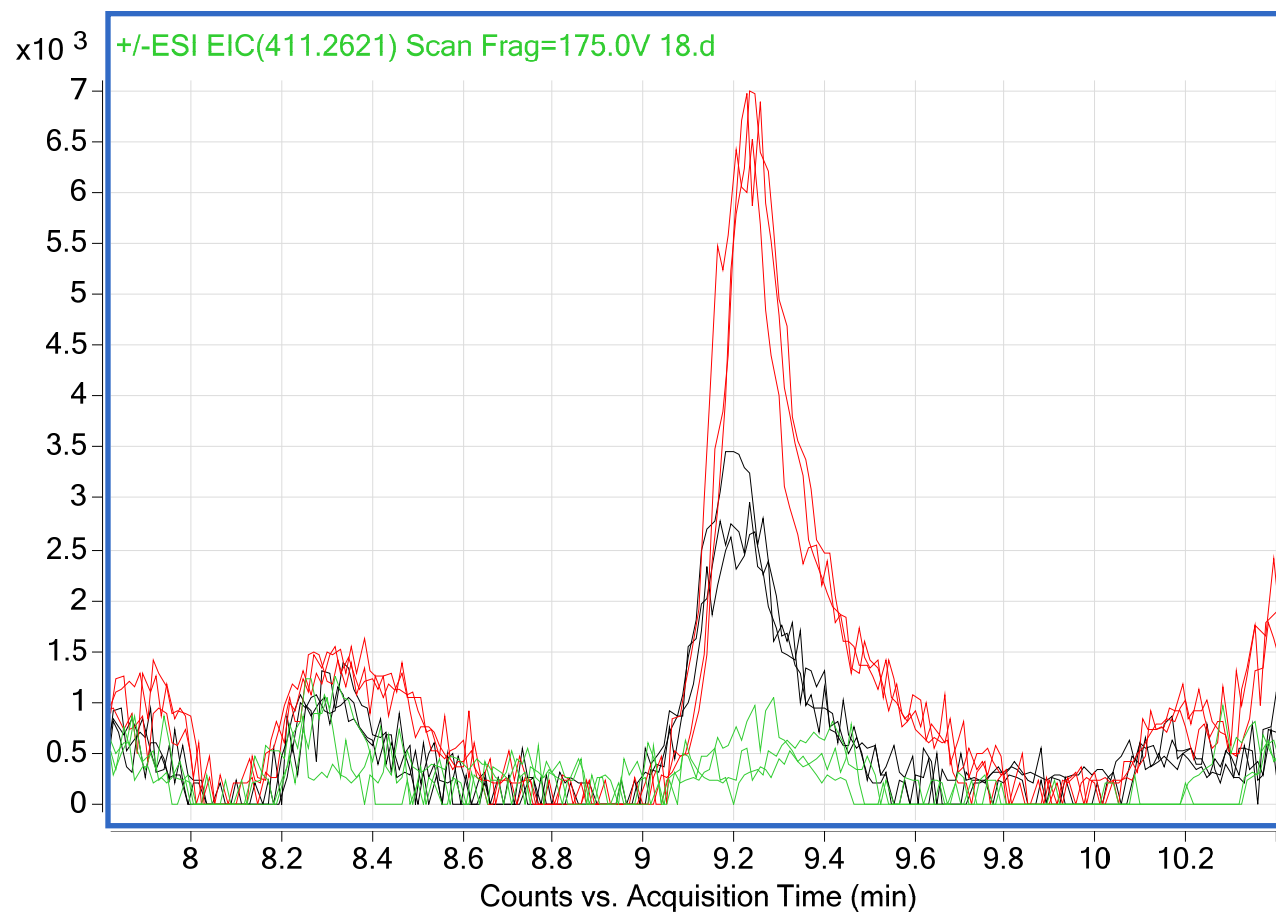

**Figure S7.** Extracted ion chromatograms showing strain-related differences for Saliniketal B day 29; 3% NaCl; M413; SW15; SW17.
